# Supplementary material
Source: PubMed Central journal article supplement (PMC2951714)
Supplement: 97320630004258S1.pdf [file 97320630004258S1.pdf]

Supplementary material:

Table 1: Leader genes in human oral lichen planus (OLP) and in human oral squamous cell carcinoma (OSCC)

| OLP             |                                                  |                                                  |                             | OSCC            |                                                      |                          |                             |
|-----------------|--------------------------------------------------|--------------------------------------------------|-----------------------------|-----------------|------------------------------------------------------|--------------------------|-----------------------------|
| Official Symbol | Official Name                                    | Role                                             | Involvement in PI3K pathway | Official Symbol | Official Name                                        | Role                     | Involvement in PI3K pathway |
| <b>TP53</b>     | tumor protein p53                                | Regulation of cell cycle                         | X                           | <b>TP53</b>     | tumor protein p53                                    | Regulation of cell cycle | X                           |
|                 |                                                  | Apoptotic signalling                             |                             |                 |                                                      | Apoptotic signalling     |                             |
| DCN             | decorin                                          | Cellular damage                                  |                             | RB1             | retinoblastoma 1                                     | Regulation of cell cycle |                             |
| CASP3           | caspace 3                                        | Regulation of cell cycle                         |                             | <b>CDKN1A</b>   | cyclin-dependent kinase inhibitor 1A (p21, Cip1)     | Regulation of cell cycle | X                           |
|                 |                                                  | Apoptotic signalling                             |                             |                 |                                                      | Apoptotic signalling     |                             |
| MMP2            | matrix metalloproteinase                         | Cellular damage<br>Cellular damage               |                             | BRCA1           | breast cancer 1, early onset                         | Regulation of cell cycle |                             |
| TGFB1           | transforming growth factor beta 1                | Cellular damage                                  |                             | CTNNB1          | catenin (cadherin-associated protein), beta 1, 88kDa | Regulation of cell cycle |                             |
| <b>CDKN1A</b>   | cyclin-dependent kinase inhibitor 1A (p21, Cip1) | Regulation of cell cycle                         | X                           |                 |                                                      |                          |                             |
| MDM2            | Mdm2 p53 binding protein homolog (mouse)         | Apoptotic signalling<br>Regulation of cell cycle | X                           |                 |                                                      |                          |                             |
|                 |                                                  | Apoptotic signalling                             |                             |                 |                                                      |                          |                             |

Shared leader genes are shown in bold type. Their role in OLP and, and the involvement in PI3K signalling events mediated by AKT, as derived from Protein Interaction Database is also shown
